# Supplementary material for: Whole Exome Sequencing Identifies Frequent Somatic Mutations in Cell-Cell Adhesion Genes in Chinese Patients with Lung Squamous Cell Carcinoma
Source: PubMed Central journal article supplement (PMC4621504; doi:10.1038/srep14237), 2015-10-27
Supplement: srep14237-s1.pdf [file srep14237-s1.pdf]

**Whole Exome Sequencing Identifies Frequent Somatic Mutations in Cell-Cell Adhesion Genes in Chinese Patients with Lung Squamous Cell Carcinoma**

Chenguang Li, Zhibo Gao, Fei Li, Xiangchun Li, Yihua Sun, Mengyun Wang, Dan Li, Rui Wang, Fuming Li, Rong Fang, Yunjian Pan, Xiaoyang Luo, Jing He, Liangtao Zheng, Jufeng Xia, Lixin Qiu, Jun He, Ting Ye, Ruoxin Zhang, Minghui He, Meiling Zhu, Haichuan Hu, Tingyan Shi, Xiaoyan Zhou, Menghong Sun, Shilin Tian, Yong Zhou, Qiaoxiu Wang, Longyun Chen, Guangliang Yin, Jingya Lu, Renhua Wu, Guangwu Guo, Yingrui Li, Xueda Hu, Lin Li, Asan, Qin Wang, Ye Yin, Qiang Feng, Bin Wang, Hang Wang, Mingbang Wang, Xiaonan Yang, Xiuqing Zhang, Huanming Yang, Li Jin, Cun-Yu Wang, Hongbin Ji, Haiquan Chen, Jun Wang, Qingyi Wei

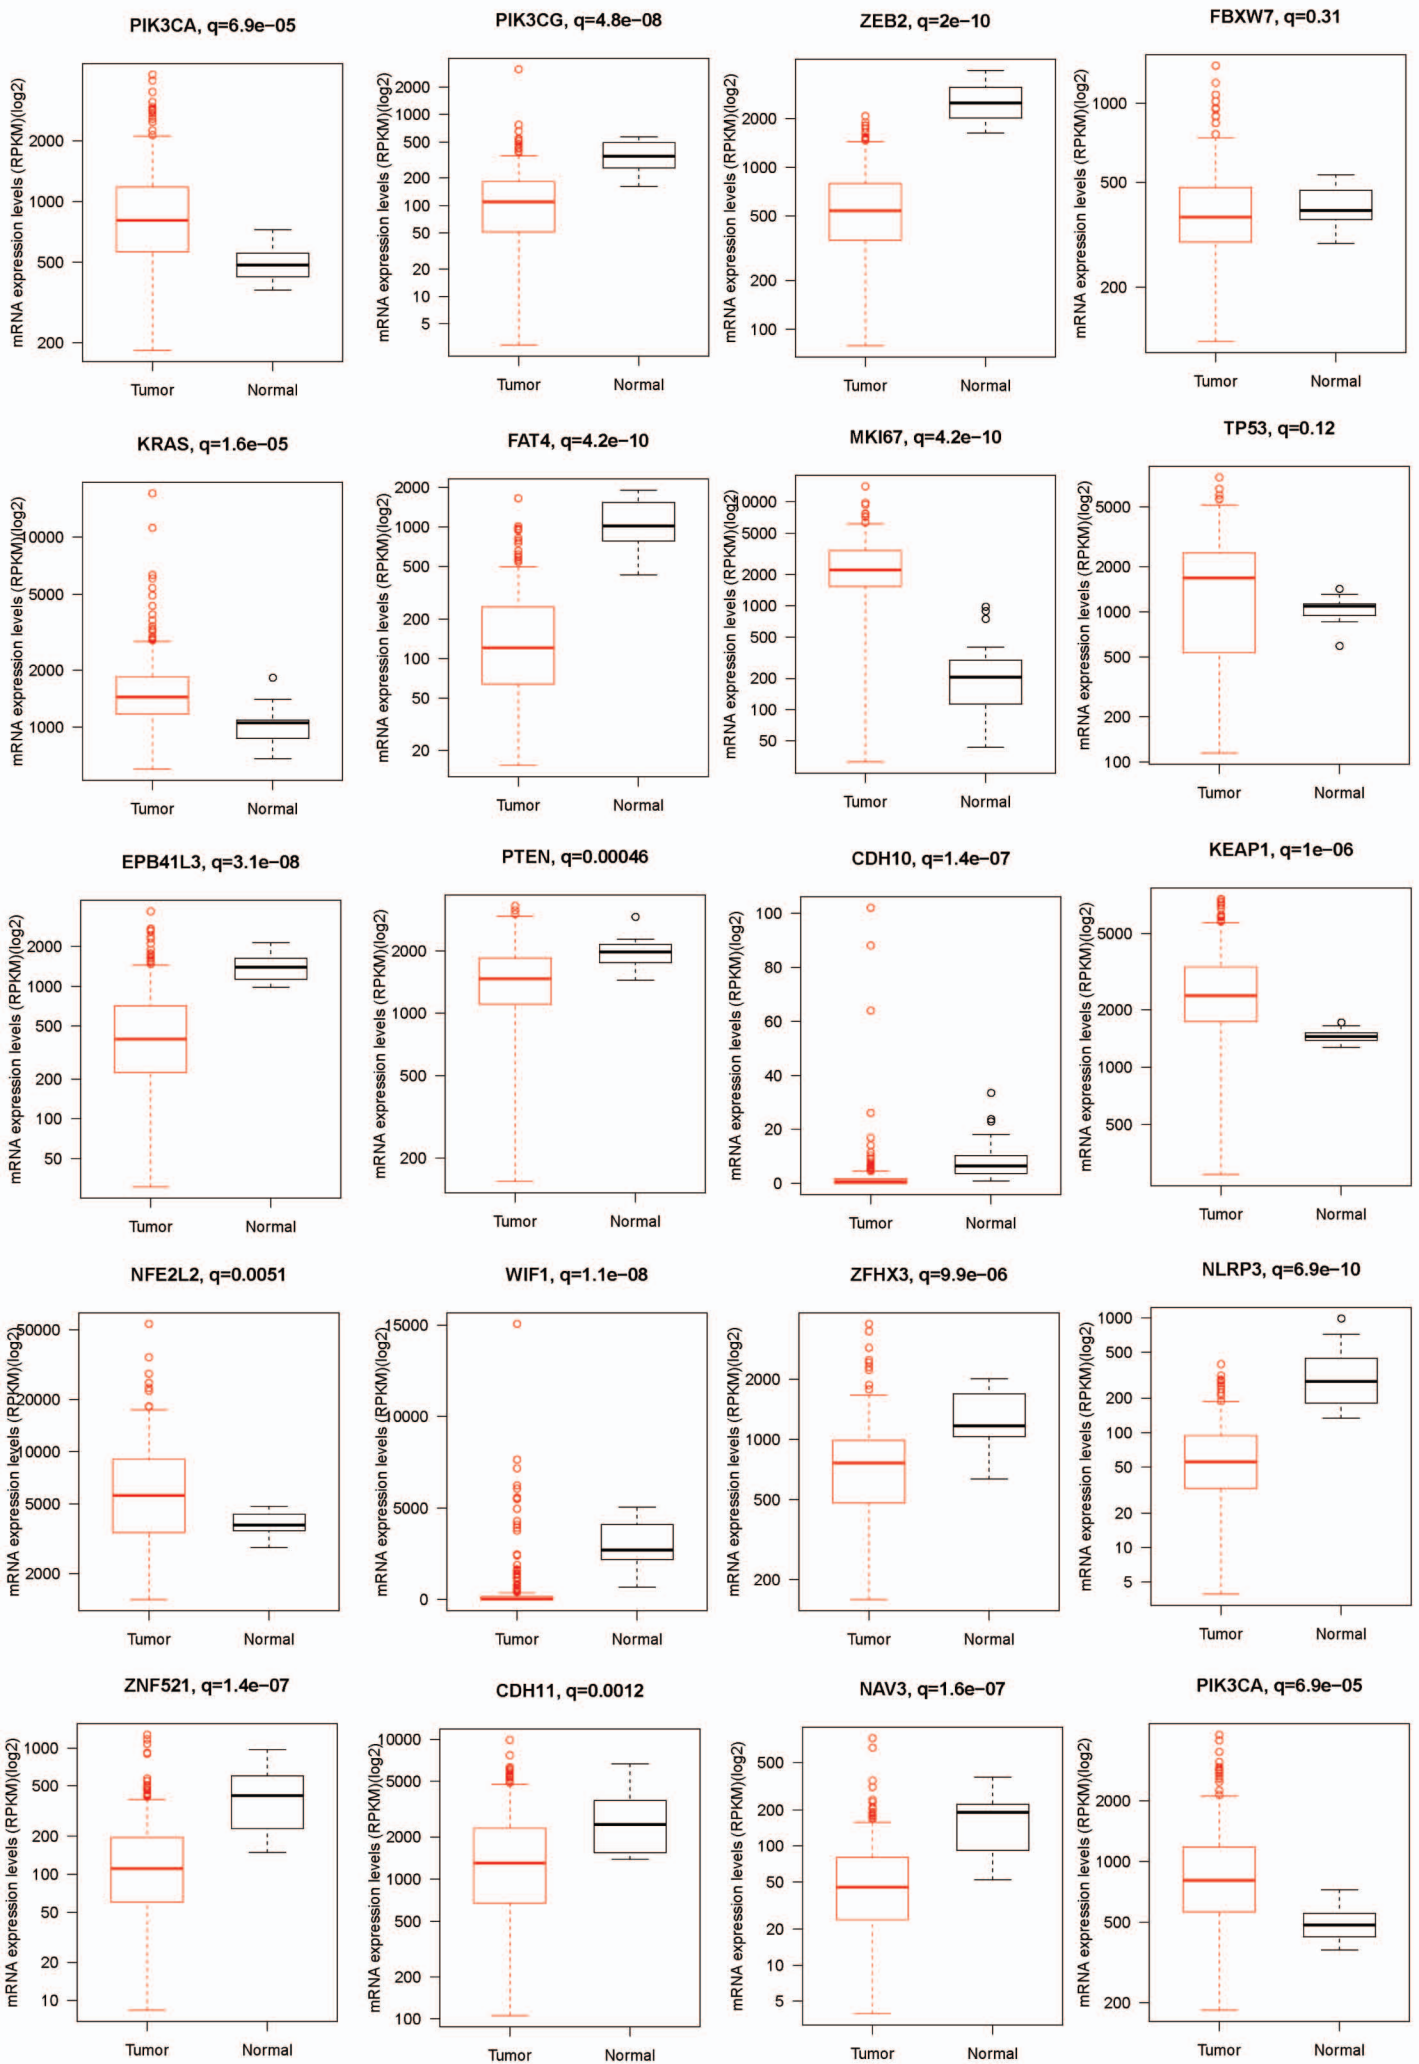

Supplementary Figure 2

|                                |                                |                                 |
|--------------------------------|--------------------------------|---------------------------------|
| AATAATATCTCGCCGGAGCTTTTTTTCCTC | CTGCAAACAGTACTACTATAACTTGAAAAA | Reference Sequence              |
| .....                          | .....G.....                    | FCD1C84ACXX:1:1210:3976:64584   |
| .....A.....                    | .....                          | FCC125BACXX:6:1301:18132:123210 |
| .....                          | .....G.....G.....              | FCD1C84ACXX:1:1109:11648:18451  |
| .....A.....                    | .....                          | FCD1C84ACXX:1:1313:13398:11903  |
| .....                          | .....A.....G.....G.....        | FCD1C84ACXX:1:1211:6882:28472   |
| .....                          | .....G.....                    | FCC125BACXX:6:2302:7176:39104   |
| .....                          | .....                          | FCD1C84ACXX:1:1205:15619:50510  |
| .....                          | .....                          | FCD1C84ACXX:1:2103:15052:74944  |
| .....                          | .....G.....                    | FCC125BACXX:6:1208:4884:163989  |
| .....                          | .....                          | FCC125BACXX:6:2204:20401:46218  |
| .....                          | .....                          | FCD1C84ACXX:1:1212:17383:89626  |
| .....C.....                    | .....G.....                    | FCD1C84ACXX:1:2112:20414:32478  |
| .....                          | .....                          | FCC125BACXX:6:1106:9680:164443  |
| .....A.....                    | .....                          | FCC125BACXX:6:2304:14375:166096 |
| .....A.....                    | .....                          | FCC125BACXX:6:2207:9493:116065  |
| .....                          | .....                          | FCC125BACXX:6:2202:2226:24204   |
| .....                          | .....                          | FCC125BACXX:6:1101:5757:30854   |
| .....                          | .....                          | FCC125BACXX:6:2104:8460:168174  |
| .....                          | .....                          | FCC125BACXX:6:1202:6505:133864  |
| .....G.....A.....              | .....                          | FCC125BACXX:6:1304:2038:73838   |
| .....G.....                    | .....G.....                    | FCD1C84ACXX:1:2112:19928:46170  |
| .....                          | .....                          | FCC125BACXX:6:2304:8078:90311   |
| .....                          | .....                          | FCC125BACXX:6:1206:11925:60926  |
| .....N.....                    | .....G.....                    | FCD1C84ACXX:1:2204:15367:56264  |
| .....                          | .....                          | FCC125BACXX:6:2201:16593:57153  |
| .....                          | .....                          | FCC125BACXX:6:2306:13094:87502  |
| .....A.....                    | .....                          | FCC125BACXX:6:2203:8318:57957   |
| .....                          | .....                          | FCC125BACXX:6:1101:6214:121658  |
| .....                          | .....G.....                    | FCC125BACXX:6:1305:9311:35444   |
| .....                          | .....                          | FCC125BACXX:6:1106:14290:171306 |
| .....A.....                    | .....                          | FCC125BACXX:6:1106:6111:141559  |
| .....                          | .....G.....                    | FCD1C84ACXX:1:1207:12322:94888  |
| .....                          | .....G.....                    | FCD1C84ACXX:1:2208:17380:97933  |
| .....                          | .....                          | FCC125BACXX:6:1203:17129:56268  |
| .....                          | .....                          | FCC125BACXX:6:2303:16088:162544 |
| .....                          | .....                          | FCD1C84ACXX:1:2107:10556:10527  |
| .....                          | .....                          | FCC125BACXX:6:2107:15266:28602  |
| .....A.....                    | .....                          | FCC125BACXX:6:1306:16346:92240  |
| Mutation1: G>A                 | Mutation2: A>G                 |                                 |





Supplementary Figure 4

a

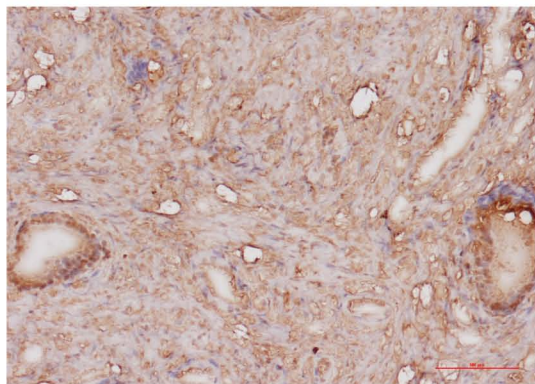

200X

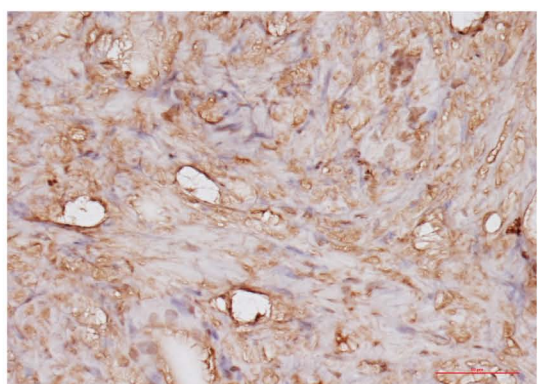

200X

b

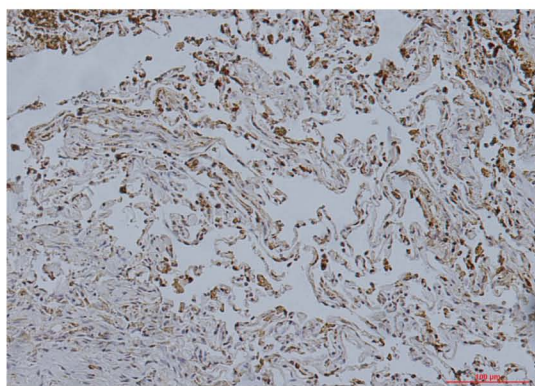

100X

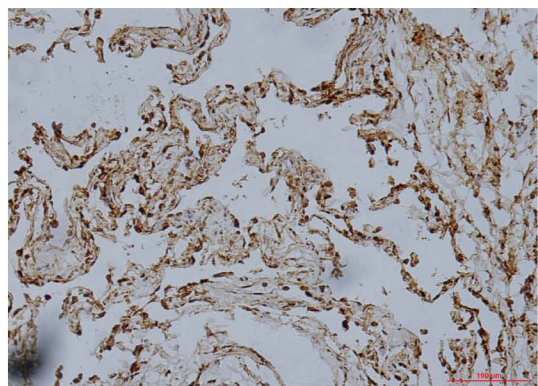

100X

c

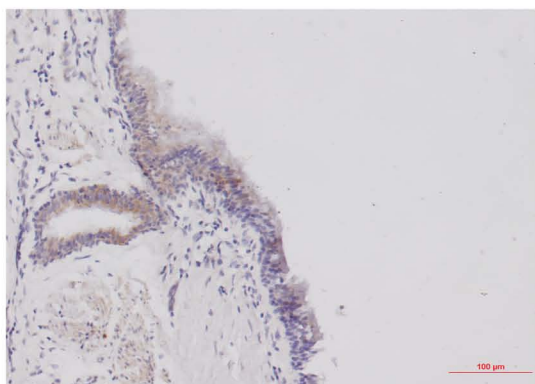

200X

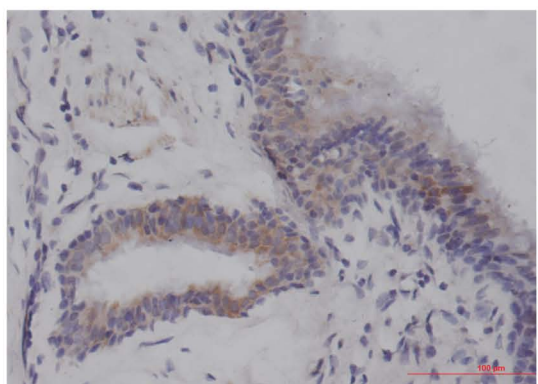

400X

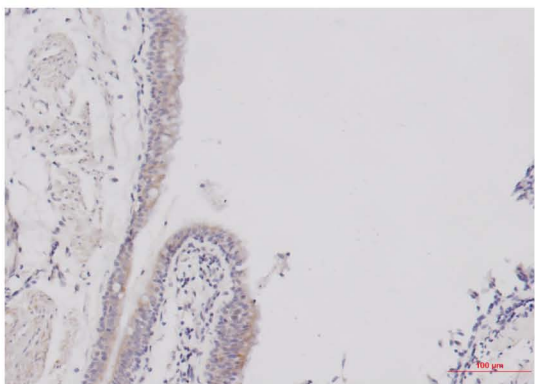

200X

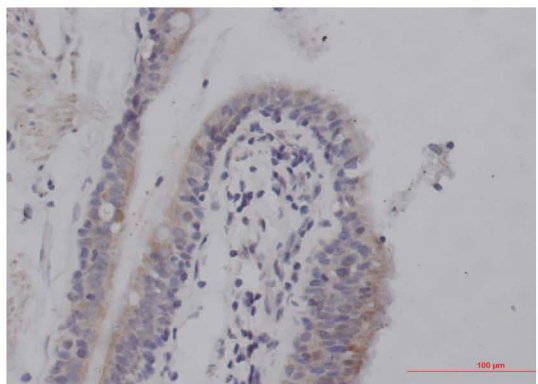

400X

a

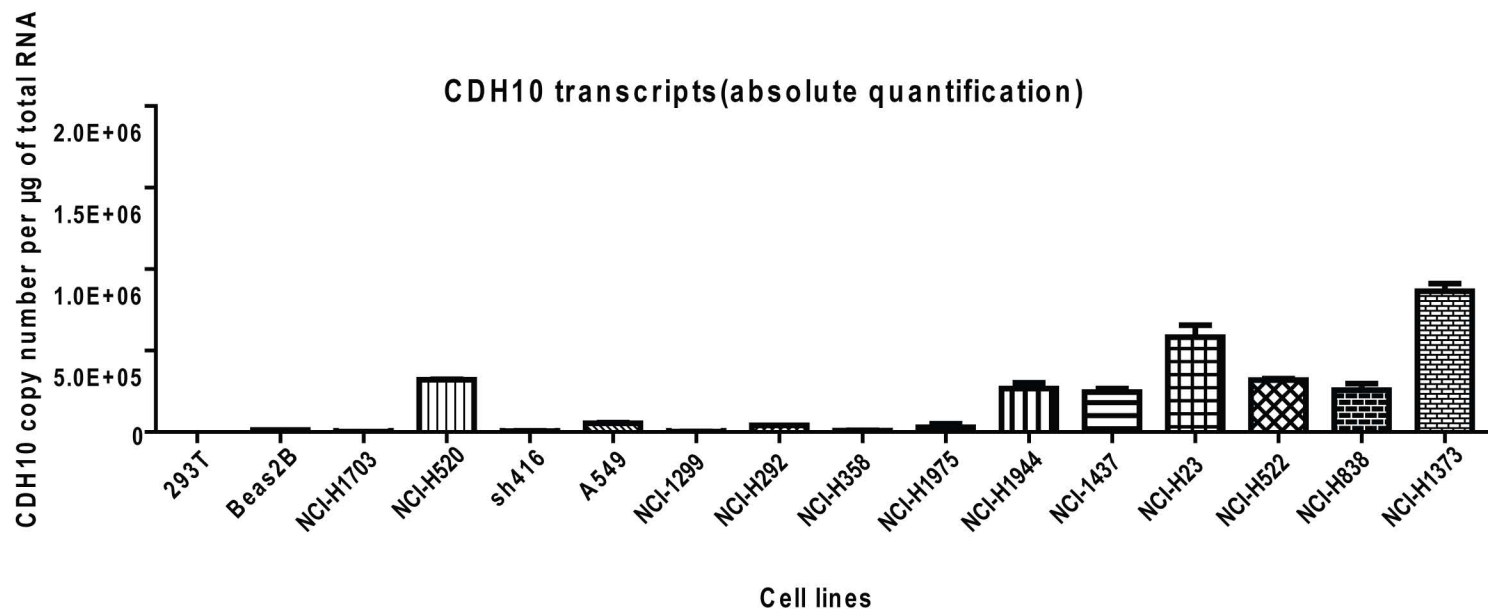

b

| NCI-H522 |        |           |        |           |        | NCI-H1373 |        |           |        |           |        |
|----------|--------|-----------|--------|-----------|--------|-----------|--------|-----------|--------|-----------|--------|
| Scramble |        | shCDH10-1 |        | shCDH10-2 |        | Scramble  |        | shCDH10-1 |        | shCDH10-2 |        |
| GAPDH    | CDH10  | GAPDH     | CDH10  | GAPDH     | CDH10  | GAPDH     | CDH10  | GAPDH     | CDH10  | GAPDH     | CDH10  |
| 16.596   | 24.061 | 15.899    | 25.801 | 16.067    | 25.506 | 16.188    | 23.371 | 15.76     | 25.189 | 15.937    | 24.888 |
| 16.458   | 23.977 | 15.854    | 25.784 | 16.091    | 25.542 | 16.264    | 23.412 | 16.044    | 25.289 | 15.583    | 24.714 |
|          | 24.206 |           | 25.697 |           | 25.69  |           | 23.229 |           | 25.372 |           | 24.907 |

c

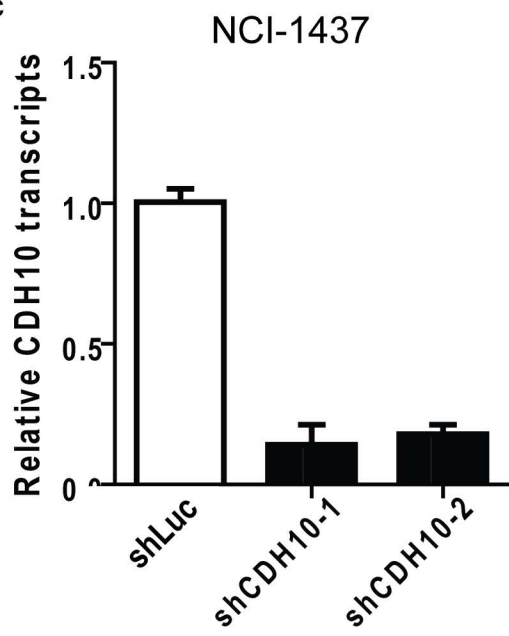

d

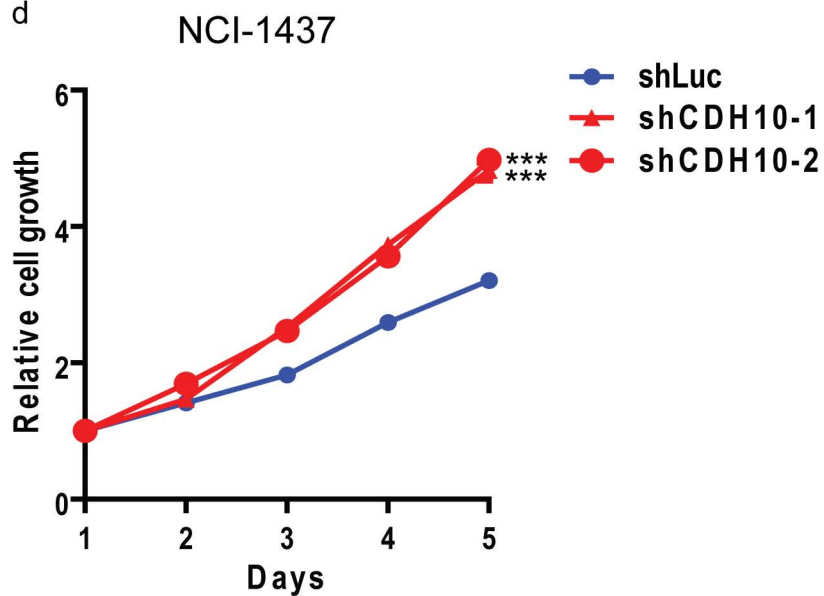



# Supplementary Figure 6

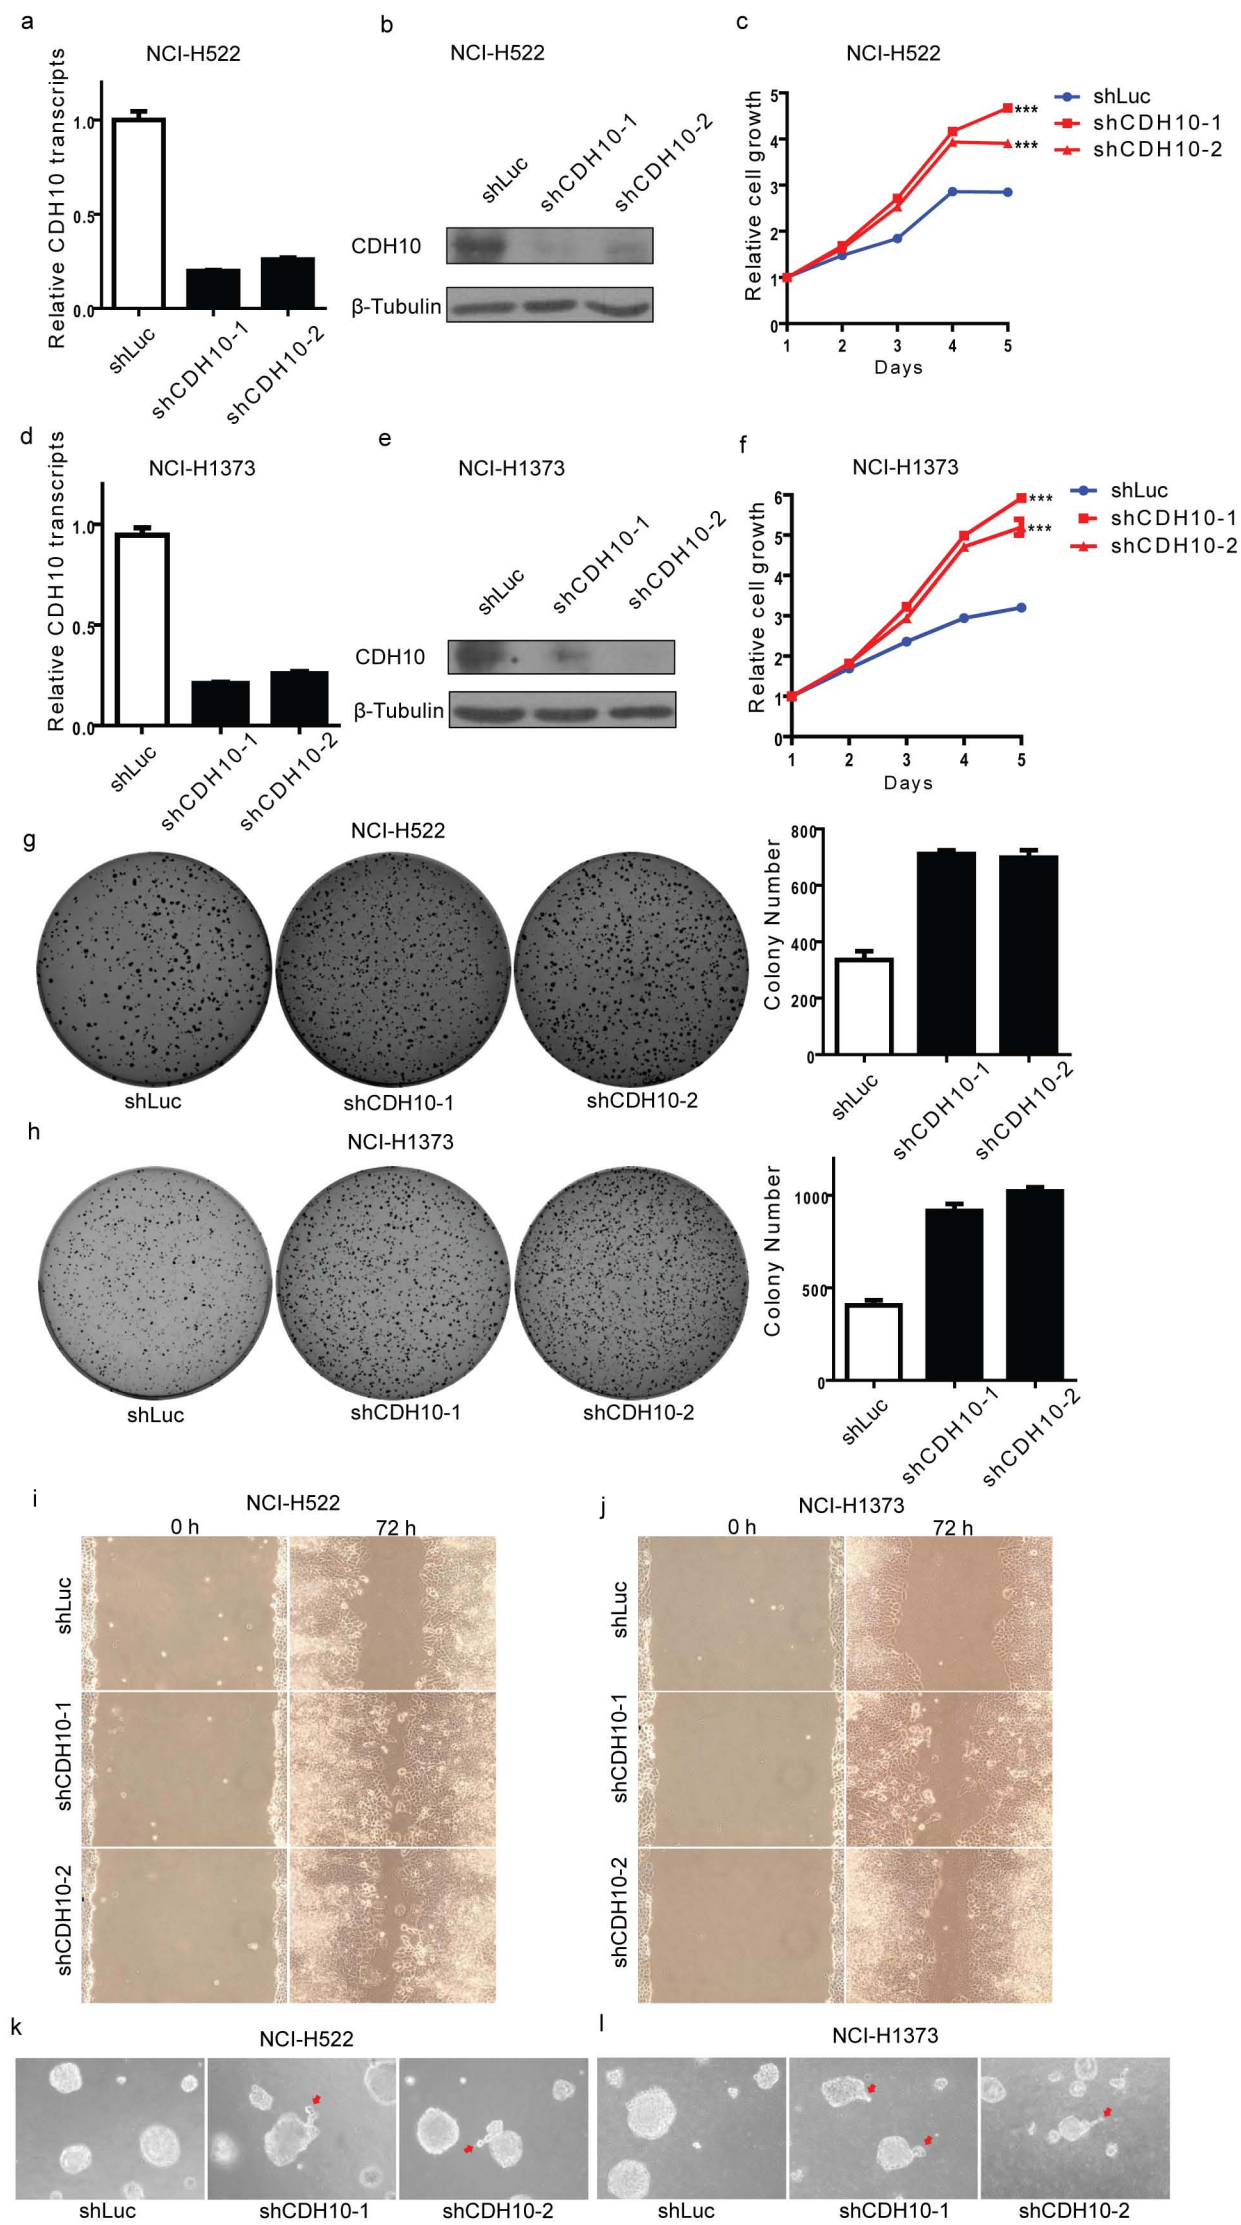

# Supplementary Figure 7

**a**

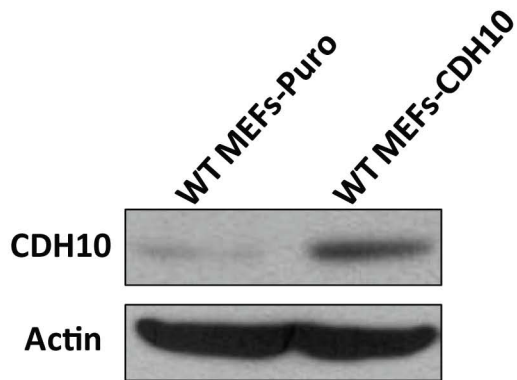

**b**

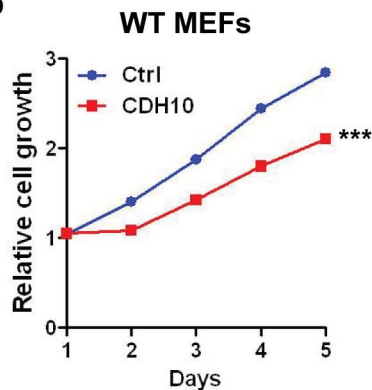

**c**

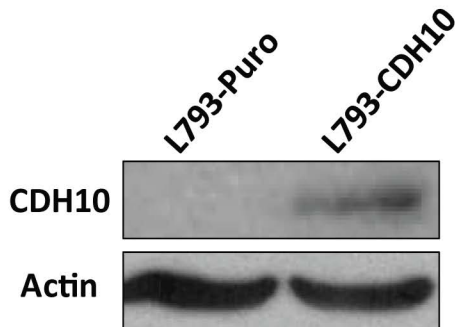

**d**

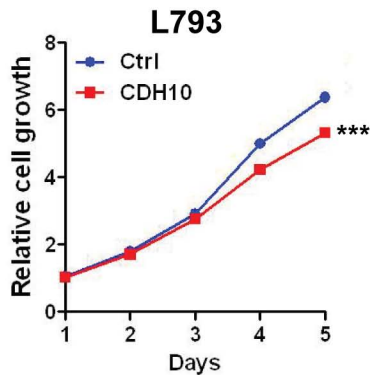



# Supplementary Figure 8

a Likely driver chromatin regulatory factor genes, overall mutation frequency 27.3%

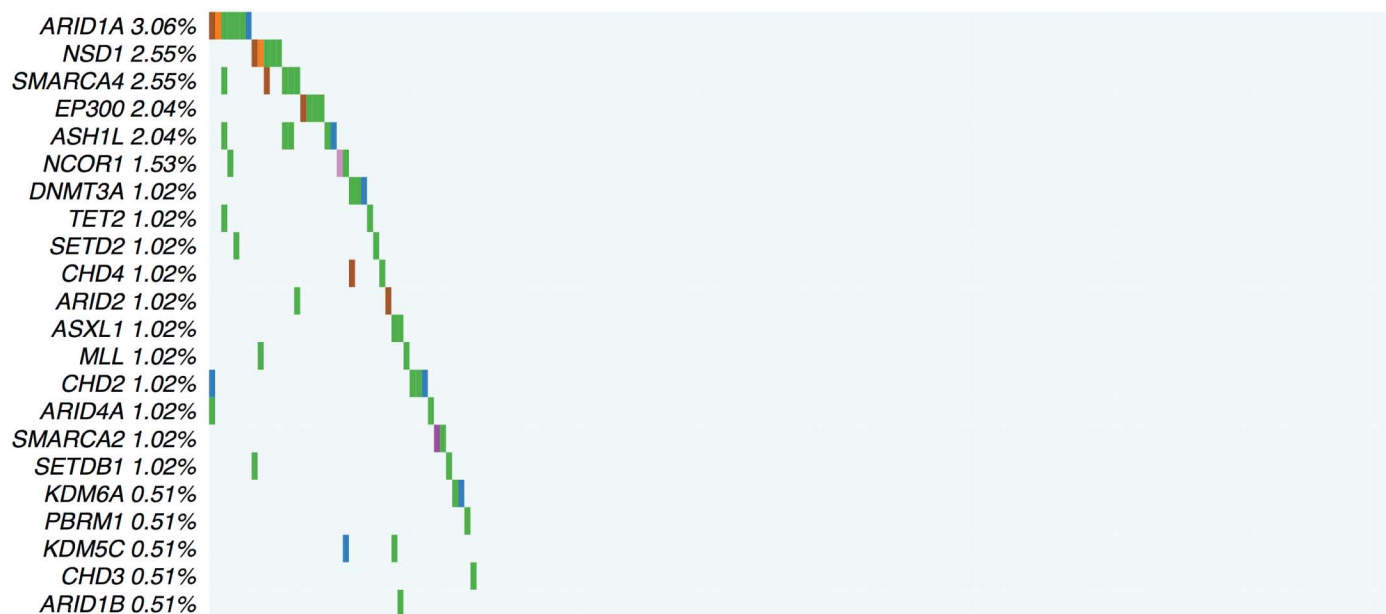

b SWI/SNF, overall mutation frequency 13.6%

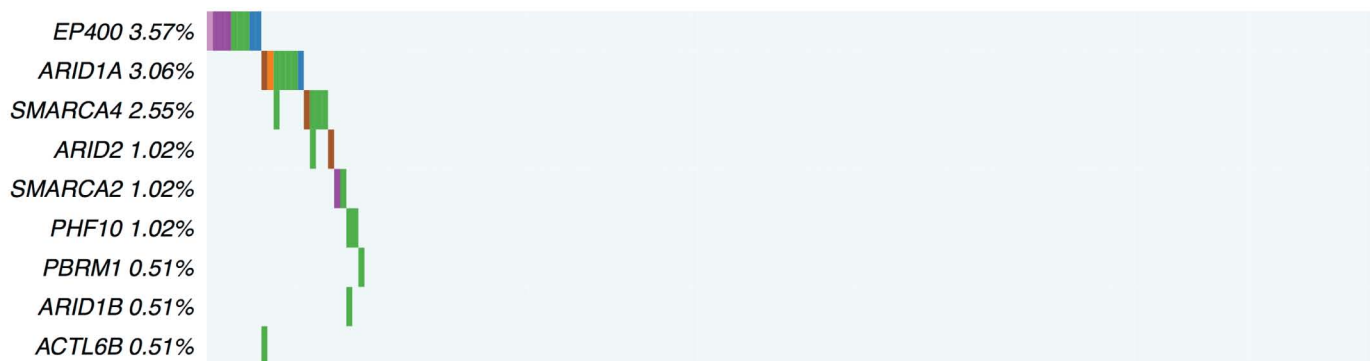

c PRC, overall mutation frequency 7.1%

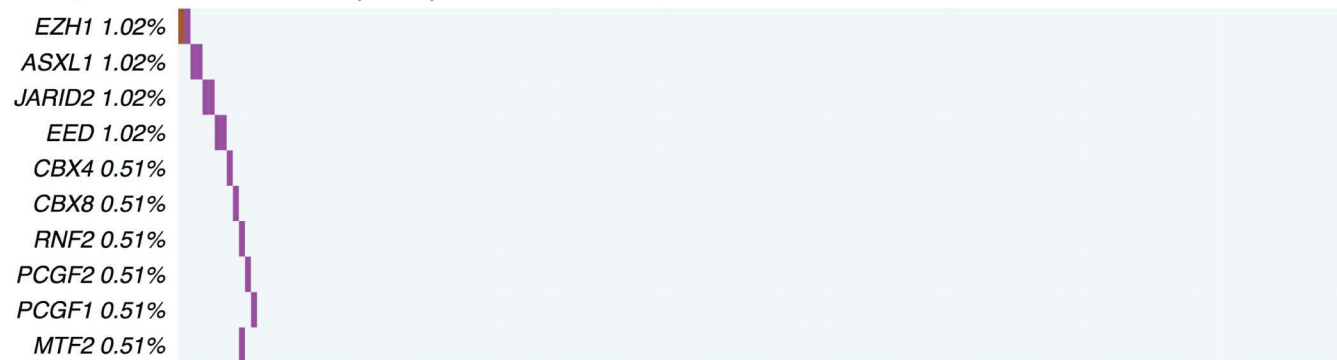

■ Nonsense     ■ Inframe shift  
■ Splice site     ■ Missense  
■ Frame shift     ■ Syn.

# Supplementary Figure 9

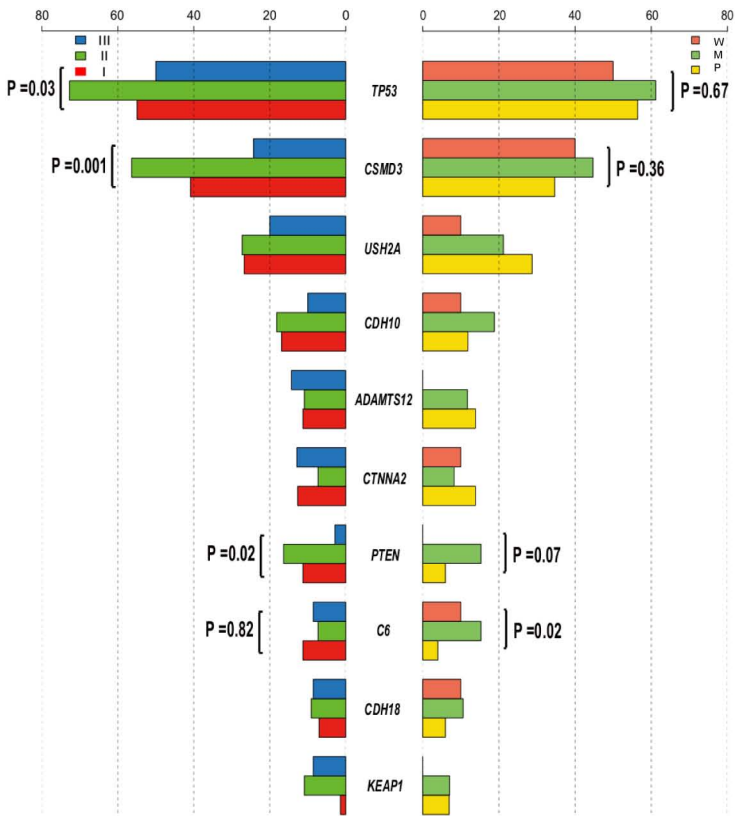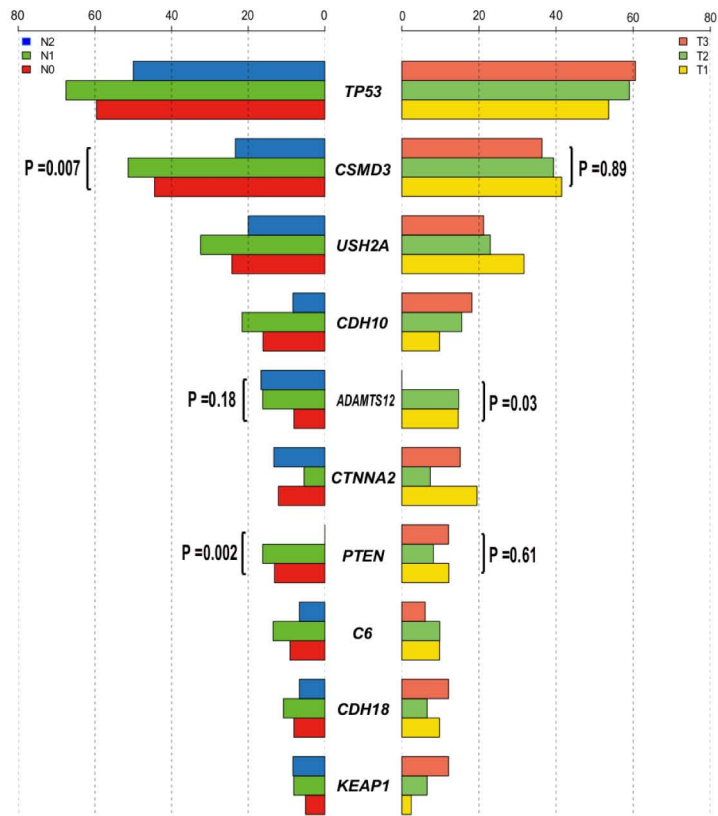

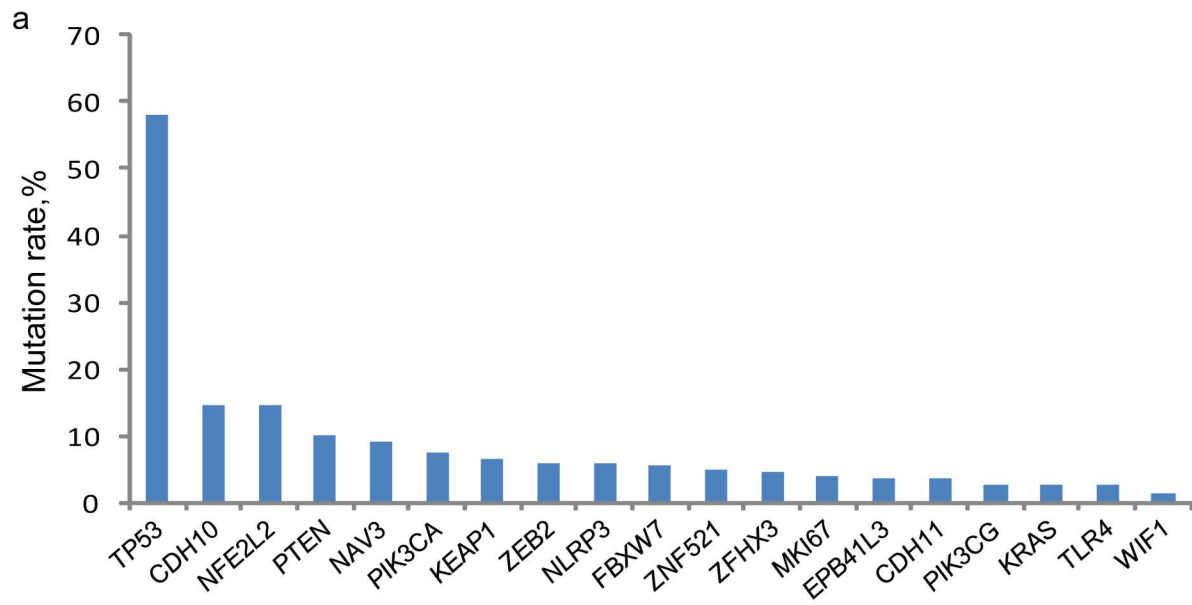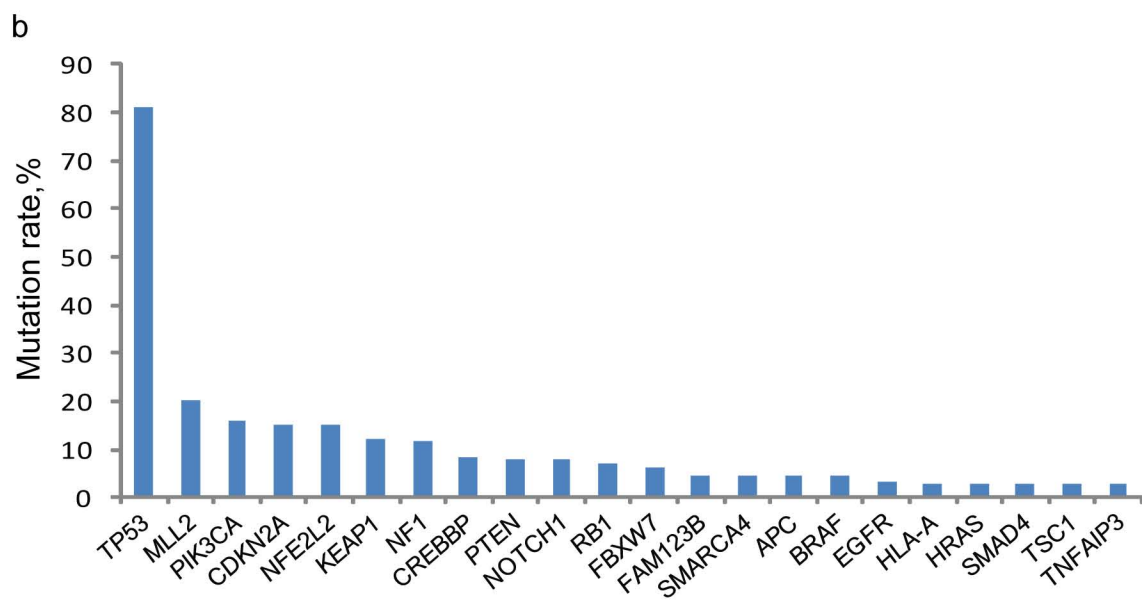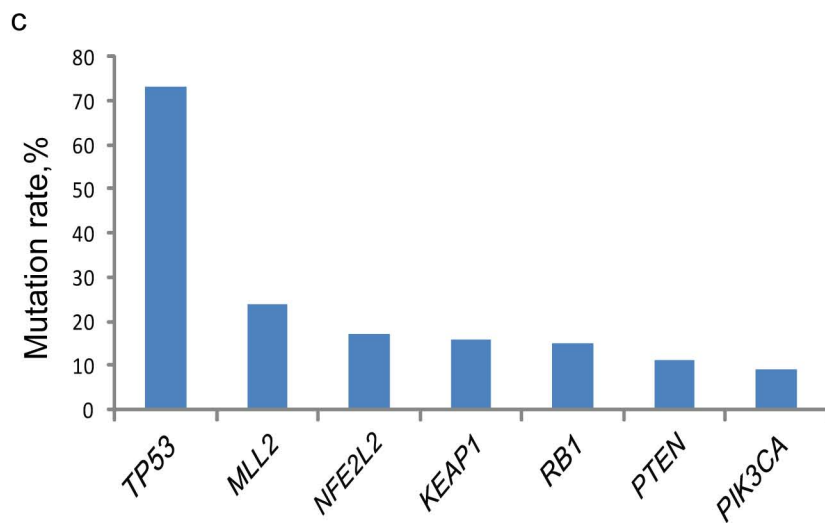



69.2% of lung SQCC samples harbor non-silent mutations of Cadherin superfamily genes, including *CDH10* (14.6%), *CDH18* (8%), *FAT4* (7%).

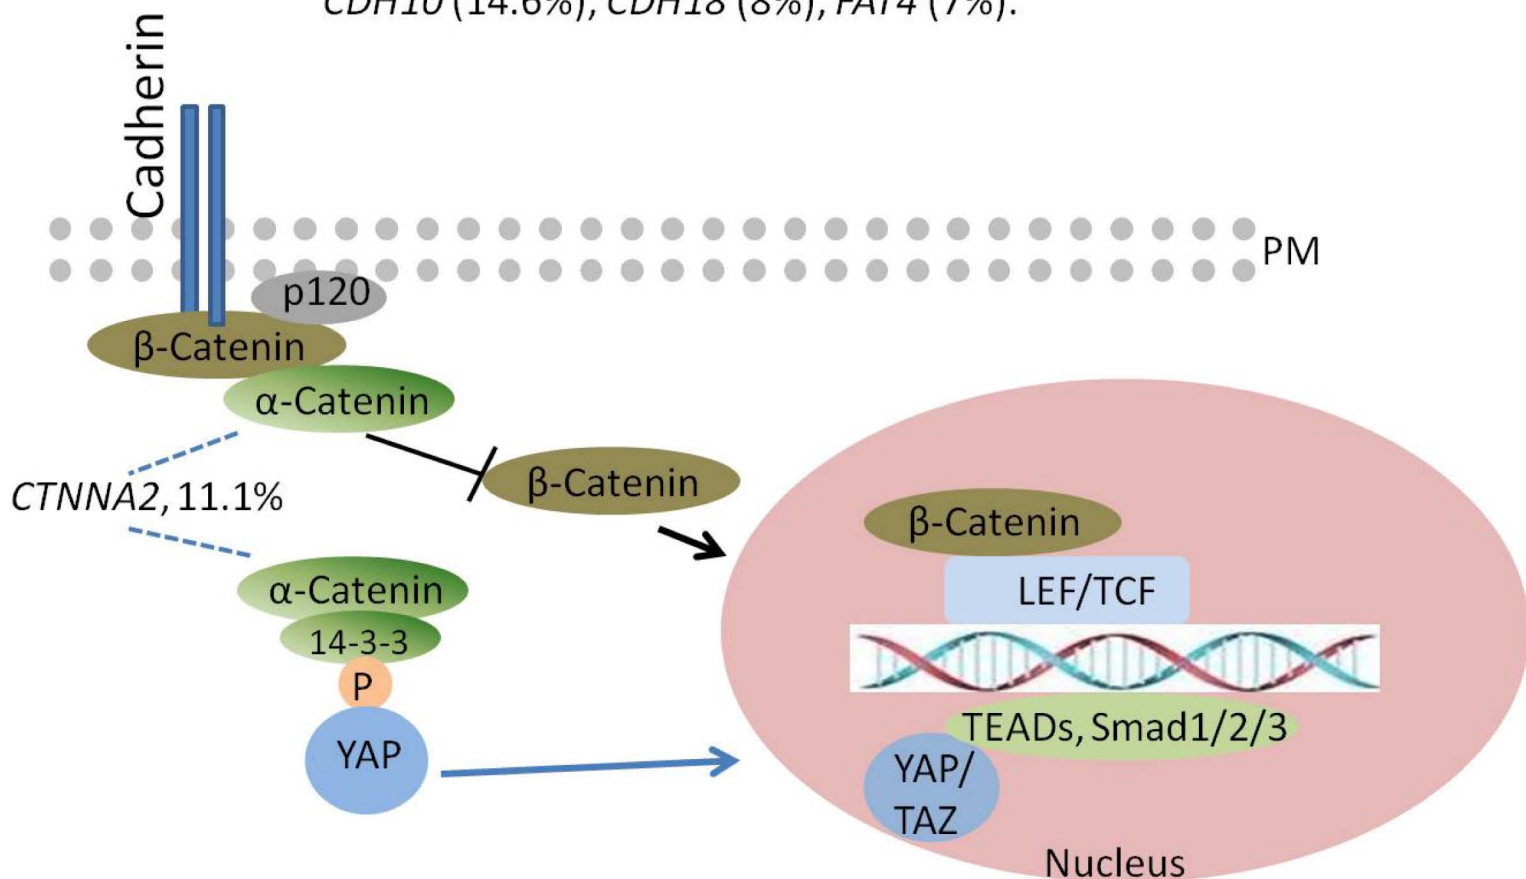

## **Supplementary Figure Legends**

### **Supplementary Figure 1. mRNA expression level of 20 SMGs in TCGA LUSC cohort.**

The tumor-normal lung mRNA expression level of 20 SMGs identified in our study were queried from the TCGA LUSC cohort.

### **Supplementary Figure 2. Bi-allelic inactivation analysis of CDH10 in sample 1019LC.**

Bi-allelic inactivating mutations in CDH10 (extracted by samtools tview), 2 SNVs were encompassed green and violet rectangles, black dot and comma represent nucleotide from forward and reverse strands, respectively.

**Supplementary Figure 3. CDH10 expression level in human tissues.** (a) The absolute transcript values of CDH10 in 1 µg RNA of normal human lung, brain and prostate samples were assessed by quantitative PCR. The CDH10 plasmid (PCDH-puro-CDH10) was used to draw the standard curve for CDH10 absolute transcript measurement. (b) The CDH10 expression was assessed by Western-blot in protein lysate from normal human lung and brain tissues. To make comparison between lung and brain tissues, 80 and 10 µg of normal lung and brain tissue lysates were loaded, respectively. Average level of brain samples were normalized as 1.

**Supplementary Figure 4.** CDH10 immunohistochemistry staining of prostate (a), pulmonary alveoli (b) and airway epithelial (c), the scale bar was 100µm.

**Supplementary Figure 5. CDH10 expression level in cell lines, knockdown efficiency of shCDH10 in cell line NCI-H522 and NCI-H1373 and MTT assay result of NCI-1437. (a)**

The absolute transcript values of CDH10 in 1  $\mu$ g RNA of each cell line were assessed by quantitative PCR. The CDH10 plasmid (PCDH-puro-CDH10) was used to draw the standard curve for CDH10 absolute transcript measurement. (b) Raw data of quantitative PCR analysis of CDH10 expression in cell lines with CDH10 knockdown. Two cell lines with highest CDH10 expression were chosen for shCDH10 expression.  $\Delta$ Ct were shown. Each experiment was repeated at least three times. (c) CDH10 knockdown efficiency was assessed in NCI-1437 cells through the real time PCR. (d) The MTT assay was performed in NCI-1437 cells with or without CDH10 knockdown, and CDH10 knockdown promoted cell proliferation. \*\*\* P<0.001.

**Supplementary Figure 6. CDH10 knockdown significantly promotes lung cancer cell proliferation, anchorage-independent cell growth, cell migration and invasion. (a)**

CDH10 knockdown efficiency was assessed in NCI-H522 cells through the real time PCR. (b) Knockdown of CDH10 in NCI-H522 detected by Western-blot. (c) The MTT assay was performed in NCI-H522 cells with or without CDH10 knockdown, and CDH10 knockdown promoted cell proliferation. \*\*\* P<0.001. (d) CDH10 knockdown efficiency was assessed in NCI-H1373 cells through the real time PCR. (e) Knockdown of CDH10 in NCI-H1373 cells detected by Western-blot. (f) The MTT assay was performed in NCI-H1373 cells with or without CDH10 knockdown, and CDH10 knockdown promoted cell proliferation. \*\*\* P<0.001. (g-h) The soft agar assay was performed in NCI-H522 (g) or NCI-H1373 (h) cells with or without CDH10 knockdown, and CDH10 knockdown promoted anchorage-independent cell



growth in both cell lines. (i-j) The wound healing assay was performed in NCI-H522 (i) and NCI-H1373 (j) cell lines, and CDH10 knockdown promoted cell migration in both cell lines. The magnification is 200×. (k-l) Cell invasion assay in matrigel was performed in NCI-H522 (k) or NCI-H1373 (l) cells, and CDH10 knockdown promoted cell invasion in both cell lines. Red arrows indicate the cell protrusion. Each experiment was repeated at least three times. The original magnification is 200X.

**Supplementary Figure 7. CDH10 overexpression significantly inhibits cell proliferation.**

(a). Overexpression of CDH10 in WT MEFs detected by western-blot. (b). Overexpression of CDH10 in WT MEFs significantly inhibited cell proliferation. (c). Overexpression of CDH10 in L793 cell line detected by western-blot. (d). Overexpression of CDH10 in L793 cell line significantly inhibited cell proliferation. Each experiment was repeated at least three times. (WT, wild-type; MEFs, mouse embryonic fibroblasts; \*\*\*,  $P < 0.001$ )

**Supplementary Figure 8. Mutations from Chromatin regulatory factor genes identified**

**in lung SQCCs.** Mutation and mutually exclusive analysis of likely driver Chromatin regulatory factor genes (a), SWI/SNF (b) and PRC protein complex genes(c).

**Supplementary Figure 9. Clinical association of frequently mutated genes in lung**

**SQCCs.** Clinical-pathological association of the highlighted genes with mutations observed in lung SQCCs, with frequencies of mutations in the highlighted genes by the TNM stage (tumor, lymph node metastasis and distant metastasis), differentiation (W, well differentiated; M,

moderately differentiated; P, poorly differentiated), N stage (lymph node metastasis alone) and T stage (tumor stage alone). For each stage or differentiation, the frequency of mutations in a given gene was calculated as the proportion of tumors harboring non-silent mutations in the gene among all tumors of the indicated stage or differentiation. The significance of the correlations between mutations and tumor stage or differentiation was determined by Fisher's exact test, two-sided.

**Supplementary Figure 10. Comparison of significantly mutated genes identified in three Lung SQCC studies (Adjusted to same analysis tools).** (a) Significantly mutated genes in the present study; (b) The TCGA Lung SQCC study; (c) The Korean Lung SQCC study.

**Supplementary Figure 11. Overview of the cadherin-catenin and YAP signaling and its regulation.**  $\alpha$ -catenin binds to  $\beta$ -catenin and inhibits the signaling through the canonical Wnt pathway. YAP acts downstream of  $\alpha$ -catenin to control transcription. In this study, 69.2% of lung SQCCs were found to harbor non-silent mutations in cadherin superfamily genes. CTNNA2 was found to be mutated in 11.1% of lung SQCCs.

**Supplementary Table 1.** Clinical information of 100 Lung SQCC patients

| Sample ID | Age (years) | Gender | Smoking status | Differentiation | TNM*    | Stage* |
|-----------|-------------|--------|----------------|-----------------|---------|--------|
| 7         | 58          | Male   | Smoker         | M               | T3N2M0  | IIIa   |
| 11        | 61          | Male   | Smoker         | M               | T2aN0M0 | I b    |
| 21        | 65          | Male   | Smoker         | M               | T2aN0M0 | I b    |
| 25        | 50          | Male   | Smoker         | M               | T2aN0M0 | I b    |
| 27        | 49          | Male   | Smoker         | P               | T2aN2M0 | IIIa   |
| 30        | 59          | Male   | Smoker         | P               | T2aN0M0 | I b    |
| 36        | 59          | Male   | Smoker         | P               | T2aN2M0 | IIIa   |
| 39        | 48          | Male   | Smoker         | M               | T2aN2M0 | IIIa   |
| 67        | 68          | Male   | Smoker         | P               | T2aN0M0 | I b    |
| 94        | 57          | Male   | Smoker         | M               | T2aN0M0 | I b    |
| 96        | 69          | Male   | Smoker         | M               | T1aN0M0 | I a    |
| 124       | 61          | Male   | Smoker         | P               | T3N2M0  | IIIa   |
| 127       | 53          | Male   | Smoker         | M               | T2aN1M0 | II a   |
| 130       | 72          | Male   | Smoker         | M               | T2aN0M0 | I b    |
| 133       | 64          | Male   | Smoker         | P               | T2bN0M0 | II a   |
| 134       | 71          | Male   | Smoker         | P               | T3N2M0  | IIIa   |
| 137       | 63          | Male   | Smoker         | M               | T1bN0M0 | I a    |
| 144       | 54          | Male   | Smoker         | P               | T2bN2M0 | IIIa   |
| 145       | 57          | Male   | Non-smoker     | M               | T1bN0M0 | I a    |
| 159       | 59          | Male   | Smoker         | M               | T3N2M0  | IIIa   |
| 160       | 48          | Male   | Smoker         | W               | T3N1M0  | IIIa   |
| 170       | 61          | Male   | Smoker         | P               | T2aN3M0 | IIIb   |
| 171       | 79          | Male   | Smoker         | P               | T1aN0M0 | I a    |
| 185       | 61          | Male   | Smoker         | P               | T1bN0M0 | I a    |
| 188       | 50          | Female | Non-smoker     | P               | T2bN2M0 | IIIa   |
| 192       | 48          | Male   | Smoker         | P               | T2bN0M0 | II a   |
| 196       | 57          | Male   | Smoker         | M               | T2aN2M0 | IIIa   |
| 207       | 61          | Male   | Smoker         | M               | T2bN0M0 | II a   |
| 209       | 62          | Male   | Smoker         | P               | T2aN0M0 | I b    |
| 214       | 78          | Male   | Smoker         | M               | T1bN0M0 | I a    |
| 225       | 63          | Male   | Smoker         | P               | T1aN0M0 | I a    |
| 234       | 55          | Male   | Smoker         | M               | T1aN0M0 | I a    |
| 257       | 60          | Male   | Smoker         | M               | T3N0M0  | II b   |
| 281       | 65          | Male   | Smoker         | M               | T1bN2M0 | IIIa   |
| 292       | 54          | Male   | Smoker         | M               | T2aN0M0 | I b    |
| 298       | 55          | Female | Non-smoker     | M               | T2aN2M0 | IIIa   |
| 299       | 50          | Male   | Smoker         | M               | T2aN1M0 | II a   |
| 301       | 60          | Male   | Smoker         | P               | T2bN2M0 | IIIa   |
| 303       | 60          | Male   | Smoker         | P               | T2aN2M0 | IIIa   |
| 310       | 51          | Male   | Smoker         | P               | T4N0M0  | IIIa   |
| 313       | 57          | Male   | Smoker         | P               | T2aN1M0 | II a   |
| 315       | 52          | Male   | Smoker         | M               | T2aN1M0 | II a   |
| 321       | 62          | Male   | Smoker         | M               | T3N1M0  | IIIa   |
| 341       | 55          | Male   | Smoker         | P               | T2bN2M0 | IIIa   |
| 343       | 65          | Female | Non-smoker     | P               | T2aN2M0 | IIIa   |
| 348       | 64          | Male   | Smoker         | M               | T3N0M0  | II b   |
| 361       | 55          | Male   | Smoker         | M               | T2aN0M0 | I b    |
| 367       | 54          | Male   | Smoker         | P               | T1bN1M0 | II a   |
| 371       | 58          | Male   | Smoker         | P               | T2aN1M0 | II a   |



|     |    |        |            |   |         |      |
|-----|----|--------|------------|---|---------|------|
| 375 | 70 | Male   | Smoker     | W | T2aN0M0 | I b  |
| 378 | 60 | Male   | Smoker     | P | T3N1M0  | IIIa |
| 387 | 48 | Female | Non-smoker | P | T2bN2M0 | IIIa |
| 394 | 54 | Male   | Smoker     | P | T1aN0M0 | I a  |
| 400 | 62 | Male   | Smoker     | P | T1aN0M0 | I a  |
| 408 | 45 | Male   | Smoker     | P | T2aN1M0 | II a |
| 416 | 56 | Female | Non-smoker | P | T2aN2M0 | IIIa |
| 417 | 68 | Male   | Smoker     | P | T1bN0M0 | I a  |
| 428 | 57 | Male   | Smoker     | M | T2aN0M0 | I b  |
| 431 | 60 | Male   | Smoker     | M | T2aN0M0 | I b  |
| 433 | 51 | Male   | Smoker     | M | T2aN0M0 | I b  |
| 438 | 70 | Male   | Smoker     | P | T2bN2M0 | IIIa |
| 451 | 63 | Male   | Smoker     | M | T1bN0M0 | I a  |
| 467 | 68 | Male   | Non-smoker | P | T3N0M0  | II b |
| 474 | 67 | Male   | Smoker     | P | T2aN2M0 | IIIa |
| 482 | 61 | Male   | Smoker     | P | T1bN0M0 | I a  |
| 503 | 57 | Male   | Smoker     | M | T2aN0M0 | I b  |
| 504 | 69 | Male   | Smoker     | M | T2aN0M0 | I b  |
| 520 | 63 | Male   | Smoker     | P | T1aN2M0 | IIIa |
| 523 | 51 | Male   | Smoker     | P | T2bN2M0 | IIIa |
| 527 | 42 | Female | Non-smoker | P | T2aN2M0 | IIIa |
| 534 | 75 | Male   | Non-smoker | M | T2bN2M0 | IIIa |
| 537 | 70 | Male   | Smoker     | W | T3N1M0  | IIIa |
| 538 | 73 | Male   | Smoker     | W | T2bN2M0 | IIIa |
| 545 | 59 | Male   | Smoker     | P | T2aN2M0 | IIIa |
| 553 | 59 | Male   | Smoker     | P | T2aN0M0 | I b  |
| 554 | 39 | Male   | Smoker     | M | T2aN0M0 | I b  |
| 601 | 49 | Male   | Smoker     | P | T2bN2M0 | IIIa |
| 611 | 63 | Male   | Non-smoker | M | T3N1M0  | IIIa |
| 623 | 50 | Male   | Smoker     | P | T2aN0M0 | I b  |
| 699 | 64 | Male   | Smoker     | P | T2aN0M0 | I b  |
| 700 | 62 | Male   | Smoker     | M | T1aN1M0 | II a |
| 715 | 58 | Male   | Smoker     | P | T2bN0M0 | II a |
| 755 | 62 | Male   | Smoker     | P | T2aN0M0 | I b  |
| 757 | 55 | Male   | Smoker     | P | T2aN1M0 | II a |
| 804 | 59 | Male   | Smoker     | P | T2aN0M0 | I b  |
| 814 | 67 | Male   | Smoker     | M | T2aN2M0 | IIIa |
| 821 | 47 | Male   | Smoker     | M | T1bN2M0 | IIIa |
| 830 | 54 | Male   | Smoker     | M | T2aN2M0 | IIIa |
| 856 | 72 | Male   | Non-smoker | P | T1aN0M0 | I a  |
| 863 | 52 | Male   | Non-smoker | M | T1aN0M0 | I a  |
| 869 | 61 | Female | Smoker     | P | T3N2M0  | IIIa |
| 873 | 63 | Male   | Smoker     | M | T2bN2M0 | IIIa |
| 882 | 69 | Male   | Smoker     | P | T1bN0M0 | I a  |
| 886 | 51 | Female | Non-smoker | P | T2aN2M0 | IIIa |
| 888 | 69 | Male   | Smoker     | P | T2bN0M0 | II a |
| 896 | 69 | Male   | Smoker     | P | T1aN0M0 | I a  |
| 901 | 61 | Male   | Smoker     | M | T3N0M0  | II b |
| 909 | 64 | Female | Non-smoker | P | T2aN2M0 | IIIa |
| 916 | 55 | Male   | Smoker     | M | T2aN2M0 | IIIa |
| 935 | 56 | Male   | Smoker     | M | T2bN2M0 | IIIa |

---

\*The TNM stage and stage grouping are according to UICC 2009 NSCLC staging system. W, well differentiated; M, moderately differentiated; P, poorly differentiated.

**Supplementary Table 2.** Clinical information of additional Lung SQCCs for TCS validation

| Sample ID | Age (years) | Gender | Smoking status | Differentiation | TNM*    | Stage* |
|-----------|-------------|--------|----------------|-----------------|---------|--------|
| 1019      | 83          | Female | Non-smoker     | P               | T2aN0M0 | I b    |
| 1021      | 55          | Male   | Smoker         | M               | T2aN0M0 | I b    |
| 1038      | 74          | Male   | Smoker         | P               | T2aN1M0 | II a   |
| 1043      | 48          | Male   | Smoker         | P               | T1bN0M0 | I a    |
| 1080      | 59          | Female | Non-smoker     | P               | T3N0M0  | II b   |
| 1088      | 67          | Male   | Smoker         | P               | T2aN0M0 | I b    |
| 1096      | 52          | Male   | Smoker         | M               | T3N0M0  | II b   |
| 1108      | 76          | Male   | Smoker         | M               | T2bN0M0 | II a   |
| 1115      | 67          | Male   | Smoker         | M               | T2aN1M0 | II a   |
| 1125      | 60          | Male   | Smoker         | M               | T2aN2M0 | IIIa   |
| 1149      | 56          | Male   | Smoker         | W               | T2aN0M0 | I b    |
| 1167      | 48          | Male   | Smoker         | M               | T2aN1M0 | II a   |
| 1175      | 64          | Male   | Smoker         | P               | T3N0M0  | II b   |
| 1185      | 58          | Male   | Smoker         | P               | T2aN2M0 | IIIa   |
| 1194      | 58          | Male   | Smoker         | P               | T2aN0M0 | I b    |
| 1217      | 70          | Male   | Smoker         | M               | T1aN0M0 | I a    |
| 1223      | 58          | Male   | Smoker         | P               | T1bN2M0 | IIIa   |
| 1233      | 56          | Male   | Smoker         | M               | T1bN2M0 | IIIa   |
| 1239      | 67          | Male   | Smoker         | W               | T3N2M0  | IIIa   |
| 1241      | 59          | Male   | Smoker         | W               | T4N0M0  | IIIa   |
| 1246      | 75          | Female | Smoker         | M               | T2bN2M0 | IIIa   |
| 1250      | 59          | Male   | Smoker         | P               | T2aN1M0 | II a   |
| 1251      | 60          | Male   | Non-smoker     | M               | T2bN1M0 | II b   |
| 1252      | 57          | Male   | Smoker         | P               | T2aN0M0 | I b    |
| 1257      | 54          | Male   | Smoker         | P               | T2aN1M0 | II a   |
| 1264      | 71          | Male   | Non-smoker     | M               | T2aN1M0 | II a   |
| 1270      | 56          | Male   | Smoker         | P               | T3N2M0  | IIIa   |
| 1276      | 72          | Male   | Smoker         | M               | T2bN0M0 | II a   |
| 1285      | 79          | Male   | Smoker         | W               | T1aN0M0 | I a    |
| 1292      | 71          | Male   | Smoker         | P               | T1bN0M0 | I a    |
| 1294      | 58          | Male   | Smoker         | M               | T2bN0M0 | II a   |
| 1296      | 70          | Male   | Smoker         | M               | T2bN0M0 | II a   |
| 1297      | 51          | Male   | Smoker         | M               | T2aN1M0 | II a   |
| 1300      | 62          | Male   | Smoker         | P               | T2aN0M0 | I b    |
| 1314      | 63          | Male   | Smoker         | P               | T3N0M0  | II b   |
| 1322      | 62          | Male   | Smoker         | P               | T2bN1M0 | II b   |
| 1323      | 63          | Male   | Smoker         | P               | T2aN0M0 | I b    |
| 1325      | 51          | Male   | Smoker         | M               | T2aN1M0 | II a   |
| 1338      | 78          | Male   | Smoker         | M               | T3N0M0  | II b   |
| 1344      | 69          | Male   | Non-smoker     | P               | T3N2M0  | IIIa   |
| 1347      | 57          | Male   | Smoker         | P               | T2aN2M0 | IIIa   |
| 1348      | 60          | Male   | Smoker         | M               | T1aN1M0 | II a   |
| 1351      | 65          | Male   | Smoker         | P               | T2aN2M0 | IIIa   |
| 1355      | 60          | Male   | Smoker         | P               | T3N2M0  | IIIa   |
| 1361      | 64          | Male   | Smoker         | P               | T3N0M0  | II b   |
| 1368      | 59          | Male   | Smoker         | P               | T2aN2M0 | IIIa   |
| 1369      | 63          | Male   | Smoker         | P               | T2bN0M0 | II a   |
| 1370      | 68          | Male   | Smoker         | W               | T2bN0M0 | II a   |
| 1378      | 67          | Male   | Smoker         | M               | T2aN0M0 | I b    |



|      |    |        |            |   |         |      |
|------|----|--------|------------|---|---------|------|
| 1382 | 60 | Male   | Smoker     | W | T1bN0M0 | I a  |
| 1387 | 62 | Male   | Smoker     | M | T3N1M0  | IIIa |
| 1389 | 70 | Male   | Smoker     | M | T2aN1M0 | II a |
| 1395 | 57 | Male   | Smoker     | M | T2aN1M0 | II a |
| 1396 | 79 | Male   | Smoker     | P | T2aN0M0 | I b  |
| 1405 | 63 | Female | Non-smoker | P | T3N1M0  | IIIa |
| 1433 | 66 | Male   | Smoker     | M | T2aN0M0 | I b  |
| 1436 | 51 | Male   | Smoker     | P | T1aN0M0 | I a  |
| 1447 | 54 | Male   | Smoker     | M | T2aN0M0 | I b  |
| 1461 | 64 | Female | Non-smoker | M | T2aN2M0 | IIIa |
| 1477 | 45 | Female | Non-smoker | P | T3N2M0  | IIIa |
| 1485 | 56 | Male   | Smoker     | P | T2aN2M0 | IIIa |
| 1488 | 49 | Female | Non-smoker | P | T1bN2M0 | IIIa |
| 1489 | 49 | Male   | Smoker     | P | T3N2M0  | IIIa |
| 1507 | 67 | Male   | Smoker     | M | T3N0M0  | II b |
| 1530 | 76 | Male   | Smoker     | M | T2aN0M0 | I b  |
| 1535 | 70 | Male   | Smoker     | P | T1bN0M0 | I a  |
| 1540 | 87 | Male   | Smoker     | P | T1bN0M0 | I a  |
| 1556 | 45 | Male   | Smoker     | P | T2aN2M0 | IIIa |
| 1557 | 58 | Male   | Smoker     | P | T2aN1M0 | II a |
| 1567 | 71 | Male   | Smoker     | M | T1bN0M0 | I a  |
| 1570 | 54 | Male   | Smoker     | M | T1bN1M0 | II a |
| 1587 | 56 | Male   | Smoker     | M | T2aN2M0 | IIIa |
| 1589 | 54 | Male   | Smoker     | P | T2bN1M0 | II b |
| 1598 | 53 | Male   | Smoker     | M | T2bN0M0 | II a |
| 1630 | 53 | Male   | Smoker     | M | T2aN2M0 | IIIa |
| 1660 | 44 | Male   | Smoker     | M | T1bN0M0 | I a  |
| 1673 | 56 | Male   | Smoker     | P | T1bN1M0 | II a |
| 1678 | 62 | Male   | Smoker     | P | T2aN0M0 | I b  |
| 1679 | 60 | Male   | Smoker     | P | T2aN1M0 | II a |
| 1681 | 59 | Male   | Smoker     | P | T2aN1M0 | II a |
| 1689 | 60 | Male   | Smoker     | P | T1bN0M0 | I a  |
| 1691 | 72 | Male   | Smoker     | M | T2bN0M0 | II a |
| 1723 | 57 | Male   | Smoker     | M | T2bN2M0 | IIIa |
| 1730 | 56 | Male   | Smoker     | P | T2aN0M0 | I b  |
| 1740 | 56 | Male   | Smoker     | M | T2bN1M0 | II b |
| 1745 | 60 | Male   | Smoker     | P | T2aN0M0 | I b  |
| 1754 | 43 | Male   | Smoker     | M | T1aN0M0 | I a  |
| 1762 | 46 | Male   | Smoker     | M | T1bN0M0 | I a  |
| 1763 | 62 | Male   | Smoker     | M | T3N0M0  | II b |
| 1780 | 62 | Male   | Smoker     | M | T2aN0M0 | I b  |
| 1785 | 74 | Male   | Smoker     | M | T2bN0M0 | II a |
| 1796 | 71 | Male   | Smoker     | P | T2aN0M0 | I b  |
| 1797 | 74 | Male   | Smoker     | M | T2bN2M0 | IIIa |
| 1813 | 51 | Male   | Smoker     | P | T2aN2M0 | IIIa |
| 1837 | 55 | Female | Non-smoker | P | T2aN0M0 | I b  |
| 1848 | 67 | Male   | Smoker     | P | T3N0M0  | II b |
| 1855 | 62 | Male   | Smoker     | M | T3N1M0  | IIIa |
| 1862 | 63 | Male   | Smoker     | P | T1aN0M0 | I a  |

TCS, Target-Capture Sequencing. \*The TNM stage and stage grouping are according to UICC 2009 NSCLC staging system. W, well differentiated; M, moderately differentiated; P, poorly
